# Supplementary material
Source: PubMed Central journal article supplement (PMC7689885)
Supplement: ao0c04653_si_001.pdf [file ao0c04653_si_001.pdf]

## Supplementary Information

### Exploration of chromone-based thiosemicarbazone derivatives: SCXRD/DFT, spectral (IR, UV–Vis) characterization and quantum chemical analysis

Rabia Basri,<sup>1</sup> Muhammad Khalid,\*<sup>2</sup> Zahid Shafiq,\*<sup>1</sup> Muhammad Suleman Tahir,<sup>2</sup> Muhammad Usman Khan,<sup>3,4</sup> Muhammad Nawaz Tahir,<sup>5</sup> Muhammad Moazzam Naseer,<sup>6</sup> Ataulpa Albert Carmo Braga<sup>7</sup>

<sup>1</sup>*Institute of Chemical Sciences, Bahauddin Zakariya University, Multan-60800, Pakistan*

<sup>2</sup>*Department of Chemistry, Khwaja Fareed University of Engineering & Information Technology, Rahim Yar Khan, 64200, Pakistan*

<sup>3</sup>*Department of Chemistry, University of Okara, Okara-56300, Pakistan*

<sup>4</sup>*Department of Applied Chemistry, Government College University, Faisalabad-38000, Pakistan*

<sup>5</sup>*Department of Physics, University of Sargodha, Sargodha-40100, Pakistan*

<sup>6</sup>*Department of Chemistry, Quaid-i-Azam University, Islamabad-45320, Pakistan*

<sup>7</sup>*Departamento de Química Fundamental, Instituto de Química, Universidade de São Paulo, Avenida Professor Lineu Prestes, 748, São Paulo 05508-000, Brazil*

Corresponding authors E-mail addresses:

(Dr. Muhammad Khalid) [khalid@iq.usp.br](mailto:khalid@iq.usp.br) ; [muhammad.khalid@kfueit.edu.pk](mailto:muhammad.khalid@kfueit.edu.pk)

(Dr. Zahid Shafiq) [zahidshafiq25@hotmail.com](mailto:zahidshafiq25@hotmail.com)

**Table S1:** Comparison of selected bond lengths (Å) and angles (°) of **3a** by using B3LYP/6-311+G(d,p)

| Bond length |       |       | Bond angel  |       |       |
|-------------|-------|-------|-------------|-------|-------|
|             | EXP   | DFT   |             | EXP   | DFT   |
| N6-N7       | 1.371 | 1.359 | N7-N6-C14   | 120.1 | 122.5 |
| N5-C8       | 1.447 | 1.464 | N6-N7-C15   | 116.5 | 116.4 |
| C8-C9       | 1.501 | 1.536 | N5-C8-C9    | 106.4 | 109.6 |
| C9-C10      | 1.506 | 1.537 | N5-C8-C13   | 114.3 | 111.5 |
| C10-C11     | 1.528 | 1.536 | C8-N5-C14   | 124.4 | 125.7 |
| C11-C12     | 1.475 | 1.536 | C8-C9-C10   | 111.7 | 111.1 |
| C12-C13     | 1.525 | 1.536 | C9-C8-C13   | 110   | 111.5 |
| C8-C13      | 1.537 | 1.54  | C9-C10-C11  | 112.6 | 111.9 |
| S1-C14      | 1.681 | 1.687 | C10-C11-C12 | 110.5 | 111.3 |

|         |       |       |             |       |       |
|---------|-------|-------|-------------|-------|-------|
| N5-C14  | 1.331 | 1.343 | C11-C12-C13 | 112.8 | 111.5 |
| N6-C14  | 1.348 | 1.38  | C12-C13-C8  | 108.1 | 111.2 |
| N7-C15  | 1.276 | 1.29  | S1-C14-N5   | 124.3 | 126.9 |
| C15-C16 | 1.459 | 1.459 | S1-C14-N6   | 119   | 118.2 |
| C16-C17 | 1.386 | 1.404 | N5-C14-N6   | 116.7 | 115   |
| C17-C18 | 1.367 | 1.391 | N7-C15-C16  | 120.2 | 122.7 |
| C18-C19 | 1.361 | 1.397 | C15-C16-C17 | 120.9 | 122.6 |
| C19-C20 | 1.373 | 1.395 | C15-C16-C21 | 121.4 | 119   |
| C20-C21 | 1.382 | 1.398 | C16-C17-C18 | 121.1 | 121.2 |
| C16-C21 | 1.39  | 1.416 | C17-C16-C21 | 117.7 | 118.3 |
| O2-C21  | 1.381 | 1.37  | C17-C18-C19 | 120.2 | 119.6 |
| O2-C22  | 1.414 | 1.426 | C18-C19-C20 | 120.9 | 120.5 |
| C22-C23 | 1.492 | 1.506 | C19-C20-C21 | 118.8 | 119.8 |
| C23-C24 | 1.322 | 1.356 | C20-C21-C16 | 121.3 | 120.5 |
| C24-C25 | 1.425 | 1.438 | C20-C21-O2  | 122.7 | 123.6 |
| C25-C26 | 1.377 | 1.408 | C16-C21-O2  | 116   | 115.9 |
| C26-C27 | 1.366 | 1.387 | C21-O2-C22  | 116.8 | 118.9 |
| C27-C28 | 1.362 | 1.404 | O2-C22-C23  | 110   | 108.2 |
| C28-C29 | 1.363 | 1.391 | C22-C23-C24 | 126.5 | 124.1 |
| O3-C30  | 1.38  | 1.369 | C22-C23-C31 | 113.2 | 115.7 |
| C25-C30 | 1.374 | 1.406 | C23-C24-C25 | 121.7 | 121.2 |
| C29-C30 | 1.382 | 1.395 | C24-C23-C31 | 120.3 | 120.2 |
| C23-C31 | 1.463 | 1.218 | C24-C25-C26 | 124.4 | 124.1 |
| O3-C31  | 1.359 | 1.378 | C24-C25-C30 | 118   | 117.6 |
| O4-C31  | 1.201 | 1.461 | C25-C26-C27 | 120.5 | 120.5 |
| N37-N38 | 1.372 | 1.354 | C26-C25-C30 | 117.6 | 118.3 |
| 36-C39  | 1.453 | 1.464 | C26-C27-C28 | 120.9 | 120   |
| C39-C40 | 1.506 | 1.54  | C27-C28-C29 | 120.3 | 120.8 |
| C40-C41 | 1.516 | 1.537 | C28-C29-C30 | 118.3 | 118.7 |
| C41-C42 | 1.499 | 1.536 | O3-C30-C25  | 120.6 | 120.8 |
| C42-C43 | 1.506 | 1.536 | O3-C30-C29  | 117   | 117.4 |
| C39-C44 | 1.508 | 1.538 | C30-O3-C31  | 122.4 | 122.8 |
| C43-C44 | 1.509 | 1.537 | C25-C30-C29 | 122.3 | 121.8 |
| S32-C45 | 1.67  | 1.382 | C23-C31-O3  | 117   | 117.6 |
| N36-C45 | 1.325 | 1.69  | C23-C31-O4  | 124.1 | 125.1 |
| N37-C45 | 1.349 | 1.34  | O3-C31-O4   | 118.9 | 117.3 |
| N38-C46 | 1.273 | 1.291 | N38-N37-C45 | 120.4 | 123.3 |
| C46-C47 | 1.456 | 1.461 | N37-N38-C46 | 115.4 | 117.1 |
| C47-C48 | 1.385 | 1.404 | N36-C39-C40 | 112   | 111.3 |
| C48-C49 | 1.365 | 1.392 | N36-C39-C44 | 108.6 | 110   |
| C49-C50 | 1.37  | 1.396 | C39-N36-C45 | 125.7 | 124.9 |
| C50-C51 | 1.371 | 1.397 | C39-C40-C41 | 110.3 | 111.2 |
| O33-C52 | 1.365 | 1.368 | C40-C39-C44 | 111.4 | 111.3 |
| C47-C52 | 1.389 | 1.417 | C40-C41-C42 | 110.5 | 111.6 |
| C51-C52 | 1.378 | 1.399 | C41-C42-C43 | 111   | 111.2 |
| O33-C53 | 1.409 | 1.422 | C42-C43-C44 | 112.1 | 111.7 |
| C53-C54 | 1.479 | 1.505 | C39-C44-C43 | 112.1 | 111.1 |
| C54-C55 | 1.334 | 1.354 | S32-C45-N36 | 124.7 | 117.2 |
| C55-C56 | 1.422 | 1.44  | S32-C45-N37 | 119.7 | 115.8 |
| C56-C57 | 1.391 | 1.408 | N36-C45-N37 | 115.6 | 127   |
| C57-C58 | 1.374 | 1.387 | N38-C46-C47 | 121.6 | 122.2 |

|         |       |       |             |       |       |
|---------|-------|-------|-------------|-------|-------|
| C58-C59 | 1.37  | 1.403 | C46-C47-C48 | 122.3 | 122   |
| C59-C60 | 1.365 | 1.391 | C46-C47-C52 | 119.6 | 119.6 |
| C60-C61 | 1.385 | 1.368 | C47-C48-C49 | 121.5 | 121.2 |
| C56-C61 | 1.38  | 1.395 | C48-C47-C52 | 118.1 | 118.4 |
| O35-C61 | 1.377 | 1.407 | C48-C49-C50 | 119.9 | 119.6 |
| O35-C62 | 1.366 | 1.385 | C49-C50-C51 | 119.8 | 120.6 |
| C54-C62 | 1.45  | 1.213 | C50-C51-C52 | 120.6 | 119.7 |
| O34-C62 | 1.211 | 1.464 | O33-C52-C47 | 115.7 | 115.7 |

EXP=experiment, DFT=density functional theory

**Table S1:** Continued... Comparison of selected bond lengths (Å) and angles (°) of **3a** by using B3LYP/6-311+G(d,p)

| BOND ANGLE  |       |       |
|-------------|-------|-------|
|             | EXP   | DFT   |
| O33-C52-C51 | 124.2 | 123.9 |
| C52-O33-C53 | 117.9 | 119.3 |
| C47-C52-C51 | 120.1 | 120.4 |
| O33-C53-C54 | 108.9 | 108.5 |
| C53-C54-C55 | 126.5 | 124.7 |
| C53-C54-C62 | 113.9 | 114.7 |
| C54-C55-C56 | 122.2 | 121   |
| C55-C54-C62 | 119.5 | 120.6 |
| C55-C56-C57 | 124.7 | 123.9 |
| C55-C56-C61 | 117.6 | 117.8 |
| C56-C57-C58 | 120.8 | 120.5 |
| C57-C56-C61 | 117.7 | 118.4 |
| C57-C58-C59 | 119.6 | 119.9 |
| C58-C59-C60 | 121.6 | 120.7 |
| C59-C60-C61 | 118   | 118.9 |
| C60-C61-C56 | 122.2 | 117.5 |
| C60-C61-O35 | 116.9 | 121   |
| C56-C61-O35 | 120.9 | 122.7 |
| C61-O35-C62 | 121.8 | 121.6 |
| O35-C62-C54 | 118   | 118.2 |
| O35-C62-O34 | 116.9 | 117.1 |
| C54-C62-O34 | 125.1 | 124.8 |

EXP=experiment, DFT=density functional theory

**Table S2:** Comparison of selected bond lengths (Å) and angles (°) of **3b** by using B3LYP/6-311+G(d,p)

| BOND LENGTH |       |       | BOND ANGLE |       |       |
|-------------|-------|-------|------------|-------|-------|
|             | EXP   | DFT   |            | EXP   | DFT   |
| S1-25       | 1.682 | 1.675 | S1-C25-N6  | 120.2 | 119.2 |
| O2-8        | 1.375 | 1.364 | S1-C25-N7  | 124.2 | 126.6 |
| O2-16       | 1.375 | 1.391 | C8-O2-C16  | 122.3 | 123.2 |
| O3-16       | 1.207 | 1.202 | O2-C8-C9   | 117.3 | 117.6 |
| O4-17       | 1.435 | 1.435 | O2-C8-C13  | 120.5 | 121   |
| O4-18       | 1.364 | 1.366 | O2-C16-O3  | 116.8 | 117.9 |
| N5-N6       | 1.377 | 1.355 | O2-C16-C15 | 117.4 | 116.4 |

|         |       |       |             |       |       |
|---------|-------|-------|-------------|-------|-------|
| N5-24   | 1.277 | 1.286 | O3-C16-C15  | 125.8 | 125.8 |
| N6-25   | 1.35  | 1.378 | C17-O4-C18  | 120.6 | 119.1 |
| N7-25   | 1.338 | 1.351 | O4-C17-C15  | 106.3 | 107.5 |
| N7-26   | 1.438 | 1.433 | O4-C18-C19  | 125.5 | 123.7 |
| C8-C9   | 1.376 | 1.393 | O4-C18-C23  | 114.9 | 116   |
| C8-C13  | 1.386 | 1.404 | N6-N5-C24   | 115.5 | 117.4 |
| C9-C10  | 1.382 | 1.389 | N5-N6-C25   | 120   | 122.4 |
| C10-C11 | 1.372 | 1.402 | N5-C24-C23  | 120.2 | 122.1 |
| C11-C12 | 1.369 | 1.385 | N6-C25-N7   | 115.6 | 114.2 |
| C12-C13 | 1.402 | 1.407 | C25-N7-C26  | 123.2 | 125.8 |
| C13-C14 | 1.439 | 1.437 | N7-C26-C27  | 120.3 | 120.8 |
| C14-C15 | 1.332 | 1.353 | N7-C26-C31  | 118.8 | 118.6 |
| C15-C16 | 1.45  | 1.468 | C9-C8-C13   | 122.1 | 121.4 |
| C15-C17 | 1.501 | 1.5   | C8-C9-C10   | 118.9 | 118.9 |
| C18-C19 | 1.392 | 1.397 | C8-C13-C12  | 117.2 | 118.6 |
| C18-C23 | 1.4   | 1.415 | C8-C13-C14  | 117.8 | 117.4 |
| C19-C20 | 1.376 | 1.394 | C9-C10-C11  | 120.5 | 120.8 |
| C20-C21 | 1.376 | 1.393 | C10-C11-C12 | 120.1 | 119.8 |
| C21-C22 | 1.378 | 1.389 | C11-C12-C13 | 121.1 | 120.5 |
| C22-C23 | 1.395 | 1.401 | C12-C13-C14 | 125   | 124   |
| C23-C24 | 1.465 | 1.46  | C13-C14-C15 | 121.5 | 121.6 |
| C26-C27 | 1.382 | 1.404 | C14-C15-C16 | 120.3 | 120.4 |
| C26-C31 | 1.375 | 1.393 | C14-C15-C17 | 124.2 | 122.8 |
| C27-C28 | 1.393 | 1.397 | C16-C15-C17 | 115.6 | 116.8 |
| C27-C32 | 1.507 | 1.506 | C19-C18-C23 | 119.6 | 120.3 |
| C28-C29 | 1.388 | 1.398 | C18-C19-C20 | 119.9 | 120   |
| C29-C30 | 1.371 | 1.396 | C18-C23-C22 | 119.1 | 118.3 |
| C29-C33 | 1.528 | 1.51  | C18-C23-C24 | 120   | 119.5 |
| C30-C31 | 1.387 | 1.392 | C19-C20-C21 | 120.7 | 120.5 |

EXP=experiment, DFT=density functional theory

**Table S2:** Continued... Comparison of selected bond lengths (Å) and angles (°) of **3b** by using B3LYP/6-311+G(d,p)

| BOND ANGLE  |       |       |
|-------------|-------|-------|
|             | EXP   | DFT   |
| C20-C21-C22 | 120.1 | 119.5 |
| C21-C22-C23 | 120.4 | 121.5 |
| C22-C23-C24 | 120.9 | 122.2 |
| C27-C26-C31 | 120.9 | 120.5 |
| C26-C27-C28 | 117.5 | 117.7 |
| C26-C27-C32 | 120.3 | 121.6 |
| C26-C31-C30 | 120.3 | 120.6 |
| C28-C27-C32 | 122.2 | 120.7 |
| C27-C28-C29 | 122.7 | 122.7 |
| C28-C29-C30 | 118   | 118.1 |
| C28-C29-C33 | 120.8 | 120.7 |
| C30-C29-C33 | 121.2 | 121.2 |
| C29-C30-C31 | 120.7 | 120.4 |

EXP=experiment, DFT=density functional theory

**Table S3:** Natural bond orbital (NBO) analysis of compound **3a** by using B3LYP/6-311+G (d, p).

| Donor(i) | Type       | Acceptor(j) | Type         | E(2) <sup>a</sup> [kJ/mol] | E(J)E(i) <sup>b</sup> (a.u) | F(I <sub>j</sub> ) <sup>c</sup> (a.u) |
|----------|------------|-------------|--------------|----------------------------|-----------------------------|---------------------------------------|
| C43-C44  | $\pi$      | O4-C56      | $\pi^*$      | 25.15                      | 0.28                        | 0.077                                 |
| C37-C39  | $\pi$      | C33-C35     | $\pi^*$      | 21.85                      | 0.29                        | 0.072                                 |
| C47-C49  | $\pi$      | C51-C53     | $\pi^*$      | 20.86                      | 0.28                        | 0.069                                 |
| C30-C31  | $\pi$      | N9-C28      | $\pi^*$      | 18.52                      | 0.26                        | 0.064                                 |
| C47-C49  | $\pi$      | C46-C55     | $\pi^*$      | 18.04                      | 0.27                        | 0.065                                 |
| C51-C53  | $\pi$      | C47-C49     | $\pi^*$      | 17.41                      | 0.29                        | 0.064                                 |
| C46-C55  | $\pi$      | C51-C53     | $\pi^*$      | 16.47                      | 0.29                        | 0.064                                 |
| C46-C55  | $\pi$      | C43-C44     | $\pi^*$      | 15.52                      | 0.3                         | 0.065                                 |
| C43-C44  | $\pi$      | C46-C55     | $\pi^*$      | 11.66                      | 0.3                         | 0.056                                 |
| N9-C28   | $\pi$      | C30-C31     | $\pi^*$      | 7.52                       | 0.37                        | 0.051                                 |
| O4-C56   | $\pi$      | C43-C44     | $\pi^*$      | 5.24                       | 0.41                        | 0.043                                 |
| C43-C44  | $\pi$      | C40-H41     | $\partial^*$ | 1.32                       | 0.75                        | 0.029                                 |
| O4-C56   | $\pi$      | O4-C56      | $\pi^*$      | 1.01                       | 0.38                        | 0.019                                 |
| N9-C28   | $\pi$      | N9-C28      | $\pi^*$      | 0.87                       | 0.34                        | 0.016                                 |
| C43-C44  | $\pi$      | O2-C40      | $\partial^*$ | 0.77                       | 0.57                        | 0.02                                  |
| C37-C39  | $\pi$      | C37-C39     | $\pi^*$      | 0.6                        | 0.28                        | 0.012                                 |
| N5-H6    | $\partial$ | S1-C27      | $\partial^*$ | 5.51                       | 0.94                        | 0.064                                 |
| C35-C37  | $\partial$ | O2-C39      | $\partial^*$ | 4.85                       | 1.06                        | 0.064                                 |
| C40-H42  | $\partial$ | C43-C44     | $\pi^*$      | 4.42                       | 0.55                        | 0.046                                 |
| C37-C39  | $\partial$ | C30-C39     | $\partial^*$ | 3.99                       | 1.26                        | 0.063                                 |
| C47-H48  | $\partial$ | C49-C51     | $\partial^*$ | 3.61                       | 1.09                        | 0.056                                 |
| C46-C55  | $\partial$ | C46-C47     | $\partial^*$ | 3.29                       | 1.27                        | 0.058                                 |
| C21-H22  | $\partial$ | C15-C18     | $\partial^*$ | 3.08                       | 0.87                        | 0.046                                 |
| C44-C46  | $\partial$ | C43-C44     | $\partial^*$ | 2.99                       | 1.31                        | 0.056                                 |
| C10-H11  | $\partial$ | C12-H13     | $\partial^*$ | 2.64                       | 0.93                        | 0.044                                 |
| C31-C33  | $\partial$ | C33-C35     | $\partial^*$ | 2.49                       | 1.27                        | 0.05                                  |
| C31-C33  | $\partial$ | C35-H36     | $\partial^*$ | 2.32                       | 1.18                        | 0.047                                 |
| C30-C39  | $\partial$ | C37-H38     | $\partial^*$ | 2.04                       | 1.17                        | 0.044                                 |
| C37-C39  | $\partial$ | C35-H36     | $\partial^*$ | 1.99                       | 1.19                        | 0.044                                 |
| C40-H41  | $\partial$ | C43-C44     | $\pi^*$      | 1.71                       | 0.55                        | 0.028                                 |
| C53-H54  | $\partial$ | C51-C53     | $\partial^*$ | 1.14                       | 1.11                        | 0.032                                 |
| N5-H6    | $\partial$ | C10-H11     | $\partial^*$ | 1.09                       | 1.13                        | 0.031                                 |
| C37-H38  | $\partial$ | C35-C37     | $\partial^*$ | 1.02                       | 1.11                        | 0.03                                  |
| C31-H32  | $\partial$ | C30-C31     | $\partial^*$ | 0.99                       | 1.09                        | 0.029                                 |
| C53-H54  | $\partial$ | C53-C55     | $\partial^*$ | 0.81                       | 1.09                        | 0.027                                 |
| C10-C24  | $\partial$ | C21-C24     | $\partial^*$ | 0.66                       | 0.98                        | 0.023                                 |
| N7-N9    | $\partial$ | N9-C28      | $\partial^*$ | 0.59                       | 1.47                        | 0.026                                 |
| C12-C15  | $\partial$ | C12-H13     | $\partial^*$ | 0.51                       | 1.01                        | 0.02                                  |

|         |          |         |            |       |      |       |
|---------|----------|---------|------------|-------|------|-------|
| C40-H42 | $\sigma$ | C40-C43 | $\sigma^*$ | 0.5   | 0.94 | 0.019 |
| O3      | LP(2)    | O4-C56  | $\pi^*$    | 41.09 | 0.34 | 0.106 |
| O4      | LP(2)    | O3-C56  | $\sigma^*$ | 35.24 | 0.6  | 0.131 |
| O3      | LP(2)    | C46-C55 | $\pi^*$    | 28.86 | 0.35 | 0.094 |
| O2      | LP(2)    | C37-C39 | $\pi^*$    | 25.21 | 0.35 | 0.09  |
| O4      | LP(2)    | C43-C56 | $\sigma^*$ | 15.96 | 0.71 | 0.097 |
| S1      | LP(2)    | N5-C27  | $\sigma^*$ | 10.33 | 0.68 | 0.076 |
| N9      | LP(1)    | N7-H8   | $\sigma^*$ | 8.57  | 0.83 | 0.076 |
| O3      | LP(1)    | C46-C55 | $\sigma^*$ | 6.92  | 1.08 | 0.077 |
| O2      | LP(2)    | C40-H41 | $\sigma^*$ | 5.02  | 0.79 | 0.058 |
| S1      | LP(1)    | N5-C27  | $\sigma^*$ | 3.46  | 1.18 | 0.058 |
| S1      | LP(2)    | C10-H11 | $\sigma^*$ | 1.05  | 0.66 | 0.024 |
| O4      | LP(2)    | O2-C40  | $\sigma^*$ | 0.55  | 0.55 | 0.016 |
| S1      | LP(1)    | N7-H8   | $\sigma^*$ | 2.5   | 1.11 | 0.021 |

<sup>a</sup> E(2) means energy of hyper conjugative interaction (stabilization energy).

<sup>b</sup> Energy difference between donor and acceptor i and j NBO orbitals.

<sup>c</sup> F(i,j) is the Fock matrix element between i and j NBO orbitals.

**Table S4:** Natural bond orbital (NBO) analysis of investigated compound **3b** by using B3LYP/6-311+G (d, p).

| Donor(i) | Type     | Acceptor(j) | Type       | E(2) <sup>a</sup> [kJ/mol] | E(J)E(i) <sup>b</sup> (a.u) | F(I,j) <sup>c</sup> (a.u) |
|----------|----------|-------------|------------|----------------------------|-----------------------------|---------------------------|
| C44-C45  | $\pi$    | C40-C47     | $\pi^*$    | 23.27                      | 0.28                        | 0.072                     |
| C34-C36  | $\pi$    | N5-C37      | $\pi^*$    | 18.02                      | 0.25                        | 0.063                     |
| C27-C28  | $\pi$    | C30-C32     | $\pi^*$    | 14.96                      | 0.44                        | 0.072                     |
| C34-C36  | $\pi$    | C30-C32     | $\pi^*$    | 12.22                      | 0.42                        | 0.064                     |
| C20-C22  | $\pi$    | C10-C19     | $\pi^*$    | 11.31                      | 0.3                         | 0.055                     |
| C27-C28  | $\pi$    | C34-C36     | $\pi^*$    | 7.87                       | 0.6                         | 0.062                     |
| C20-C22  | $\pi$    | O4-C24      | $\sigma^*$ | 6.37                       | 0.56                        | 0.056                     |
| O3-C23   | $\pi$    | C20-C22     | $\pi^*$    | 4.96                       | 0.41                        | 0.042                     |
| C41-C42  | $\pi$    | C49-H50     | $\sigma^*$ | 2.91                       | 0.65                        | 0.043                     |
| C41-C42  | $\pi$    | C49-H52     | $\sigma^*$ | 2.15                       | 0.66                        | 0.037                     |
| C20-C22  | $\pi$    | C24-H26     | $\sigma^*$ | 1.26                       | 0.67                        | 0.027                     |
| C10-C19  | $\pi$    | C10-C19     | $\pi^*$    | 1.12                       | 0.28                        | 0.016                     |
| N5-C37   | $\pi$    | N5-C37      | $\pi^*$    | 0.89                       | 0.34                        | 0.016                     |
| C27-C28  | $\pi$    | C27-C28     | $\pi^*$    | 0.62                       | 0.29                        | 0.012                     |
| C53-H56  | $\sigma$ | C53-H55     | $\sigma^*$ | 42.91                      | 4.22                        | 0.382                     |
| C53-H56  | $\sigma$ | C34-C36     | $\pi^*$    | 18.31                      | 0.81                        | 0.12                      |
| C53-H56  | $\sigma$ | C30-C32     | $\pi^*$    | 11.96                      | 0.65                        | 0.086                     |
| C44-C53  | $\sigma$ | C53-H56     | $\sigma^*$ | 10.15                      | 3.13                        | 0.159                     |
| C44-C53  | $\sigma$ | C34-C36     | $\pi^*$    | 6.35                       | 0.95                        | 0.077                     |
| N8-H9    | $\sigma$ | S1-C39      | $\sigma^*$ | 5.85                       | 0.95                        | 0.067                     |
| C53-H54  | $\sigma$ | C37-H38     | $\sigma^*$ | 4.96                       | 1.17                        | 0.068                     |
| C53-H54  | $\sigma$ | C36-C37     | $\sigma^*$ | 3.92                       | 1.11                        | 0.059                     |

|         |          |         |            |       |      |       |
|---------|----------|---------|------------|-------|------|-------|
| C15-C17 | $\delta$ | C17-C19 | $\delta^*$ | 2.99  | 1.26 | 0.055 |
| C53-H54 | $\delta$ | C44-C45 | $\pi^*$    | 2.02  | 0.54 | 0.032 |
| C42-C44 | $\delta$ | C42-H43 | $\delta^*$ | 1.01  | 1.15 | 0.031 |
| C40-C47 | $\delta$ | C47-H48 | $\delta^*$ | 0.99  | 1.16 | 0.03  |
| N8-C39  | $\delta$ | C40-C47 | $\pi^*$    | 0.58  | 0.89 | 0.022 |
| C44-C53 | $\delta$ | C40-C47 | $\delta^*$ | 0.5   | 1.24 | 0.022 |
| O3      | LP(2)    | O2-C23  | $\delta^*$ | 37.01 | 0.57 | 0.131 |
| O3      | LP(2)    | C22-C23 | $\delta^*$ | 15.67 | 0.7  | 0.096 |
| N5      | LP(1)    | N6-H7   | $\delta^*$ | 8.35  | 0.77 | 0.072 |
| O2      | LP(1)    | C22-C23 | $\delta^*$ | 4.32  | 0.99 | 0.059 |
| S1      | LP(1)    | N8-C39  | $\delta^*$ | 3.87  | 1.16 | 0.06  |
| S1      | LP(2)    | C10-H11 | $\delta^*$ | 1.55  | 0.66 | 0.029 |
| O2      | LP(1)    | C40-H41 | $\delta^*$ | 1.12  | 0.99 | 0.030 |
| O2      | LP(1)    | C40-H42 | $\delta^*$ | 1.20  | 0.99 | 0.031 |
| O2      | LP(1)    | O3-C23  | $\delta^*$ | 2.07  | 1.17 | 0.044 |
| N5      | LP(1)    | C36-C37 | $\delta^*$ | 1.74  | 1.02 | 0.038 |
| O4      | LP(1)    | C22-C24 | $\delta^*$ | 1.32  | 0.97 | 0.032 |
| O2      | LP(1)    | C10-C11 | $\delta^*$ | 0.92  | 1.1  | 0.028 |
| S1      | LP(2)    | C40-C47 | $\pi^*$    | 0.77  | 0.22 | 0.013 |
| N5      | LP(1)    | S1-C39  | $\delta^*$ | 0.57  | 0.7  | 0.018 |

<sup>a</sup> E(2) means energy of hyper conjugative interaction (stabilization energy).

<sup>b</sup> Energy difference between donor and acceptor i and j NBO orbitals.

<sup>c</sup> F(i,j) is the Fock matrix element between i and j NBO orbitals.

**Table S5:** Calculated vibrational frequencies of **3a**.

| <sup>a</sup> <i>Freq</i><br>(unscaled) | <i>Freq</i><br>(scaled) | <sup>a</sup> <i>I</i> <sub>IR</sub> | Vibrational assignments     |
|----------------------------------------|-------------------------|-------------------------------------|-----------------------------|
| 3575                                   | 3460.243                | 32                                  | υN-H                        |
| 3546                                   | 3432.173                | 184                                 | υN-H                        |
| 3532                                   | 3418.623                | 31                                  | υN-H                        |
| 3228                                   | 3124.381                | 7                                   | υ (s)C-H <sub>Ben</sub>     |
| 3218                                   | 3114.702                | 16                                  | υ(as)+(s)C-H <sub>Ben</sub> |
| 3216                                   | 3112.766                | 12                                  | υ(as)+(s)C-H <sub>Ben</sub> |
| 3205                                   | 3102.12                 | 10                                  | υ(as)+(s)C-H <sub>Ben</sub> |
| 3199                                   | 3096.312                | 8                                   | υ(s)+(as)C-H <sub>Ben</sub> |
| 3124                                   | 3023.72                 | 17                                  | υ C-H                       |
| 3107                                   | 3007.265                | 25                                  | υ C-H                       |
| 3100                                   | 3000.49                 | 17                                  | υ(as)C-H <sub>Cyh</sub>     |
| 3099                                   | 2999.522                | 43                                  | υ(as)C-H <sub>Cyh</sub>     |
| 3095                                   | 2995.651                | 2                                   | υ(as)C-H <sub>CH2</sub>     |
| 3083                                   | 2984.036                | 27                                  | υ(s)+(as)C-H <sub>Cyh</sub> |
| 3079                                   | 2980.164                | 28                                  | υ(as)C-H <sub>Cyh</sub>     |
| 3076                                   | 2977.26                 | 42                                  | υ(as)C-H <sub>Cyh</sub>     |
| 3072                                   | 2973.389                | 80                                  | υ(as)C-H <sub>Cyh</sub>     |
| 3069                                   | 2970.485                | 78                                  | υ(s)+(as)C-H <sub>Cyh</sub> |

|       |          |     |                                                                       |
|-------|----------|-----|-----------------------------------------------------------------------|
| 3032  | 2934.673 | 34  | $\nu(s) C-H_{C_{yH}}$                                                 |
| 3027  | 2929.833 | 27  | $\nu(s) C-H_{C_{yH}}$                                                 |
| 3027  | 2929.833 | 19  | $\nu(s) C-H_{CH_2}$                                                   |
| 3020  | 2923.058 | 24  | $\nu(s) C-H_{C_{yH}}$                                                 |
| 2996  | 2899.828 | 15  | $\nu(s) C-H_{C_{yH}}$                                                 |
| 1806  | 1748.027 | 508 | $\nu C=O_{H-Pyran} + \nu (C=C-C=C_{Ben})$                             |
| 1783  | 1725.766 | 750 | $\nu C=O_{H-Pyran} + \nu (C=C-C=C_{Ben}) + \rho N-H$                  |
| 1694  | 1639.623 | 29  | $\nu (C=C-C=C_{Ben}) + \nu C=C_{H-Pyran} + w C-H_{CH_2}$              |
| 1668  | 1614.457 | 34  | $\nu (C=C-C=C_{Ben}) + \delta C-H_{Ben} + \nu C=N + \rho C-H$         |
| 1663. | 1609.618 | 88  | $\nu (C=C-C=C_{Ben}) + (\delta + \rho) C-H_{Ben}$                     |
| 1663. | 1609.618 | 58  | $\nu (C=C-C=C_{Ben}) + \delta C-H_{Ben} + \nu C=N + \rho C-H$         |
| 1626  | 1573.805 | 24  | $\nu (C=C-C=C_{Ben}) + \delta C-H_{Ben} + \nu C=N$                    |
| 1620  | 1567.998 | 37  | $\nu (C=C-C=C_{Ben}) + (\delta + \rho) C-H_{Ben} + \nu C=C_{H-Pyran}$ |
| 1578  | 1527.346 | 539 | $\nu C-N + \rho N-H$                                                  |
| 1571  | 1520.571 | 772 | $\nu C-N + \rho N-H$                                                  |
| 1540  | 1490.566 | 336 | $\nu C=S + \nu C-N + \rho N-H + \nu N-N$                              |
| 1532  | 1482.823 | 48  | $\nu C=S + \rho N-H + \delta C-H_{CH_2}$                              |
| 1531  | 1481.855 | 60  | $\nu C=S + \nu C-N + \rho N-H + \delta C-H_{CH_2}$                    |
| 1528  | 1478.951 | 179 | $\nu C=S + \nu C-N + \rho N-H + \delta C-H_{CH_2}$                    |
| 1499  | 1450.882 | 96  | $\delta C-H_{C_{yH}} + \rho C-H_{Ben} + \nu C-O$                      |
| 1497  | 1448.946 | 21  | $\nu (C=C-C=C_{Ben}) + \rho C-H_{Ben} + \nu C-O_{H-Pyran}$            |
| 1494  | 1446.043 | 39  | $\rho C-H_{Ben} + \nu C-O + \delta C-H_{CH_2}$                        |
| 1450  | 1403.455 | 51  | $\nu C=S + \nu C-N + \rho N-H + w C-H_{CH_2}$                         |
| 1442  | 1395.712 | 43  | $\nu C-C_{H-Pyran} + w C-H_{CH_2} + \nu C-O$                          |
| 1394  | 1349.253 | 28  | $(w + \tau) C-H_{C_{yH}}$                                             |
| 1377  | 1332.798 | 136 | $w C-H_{C_{yH}} + \rho N-H$                                           |
| 1374  | 1329.895 | 151 | $w C-H_{C_{yH}} + \rho N-H + \nu C-N$                                 |
| 1327  | 1284.403 | 74  | $\rho C-H_{Ben} + \nu C-O$                                            |
| 1301  | 1259.238 | 148 | $(w + \tau) C-H_{C_{yH}}$                                             |
| 1291  | 1249.559 | 301 | $(\rho + \delta) C-H_{Ben} + \nu C-O$                                 |
| 1284  | 1242.784 | 93  | $w C-H_{C_{yH}} + \rho N-H$                                           |
| 1243  | 1203.1   | 214 | $214 \quad \nu C=S + \nu C-N + \nu N-N$                               |
| 1222  | 1182.774 | 153 | $\nu C=S + \nu C-N + \rho N-H + \tau C-H_{C_{yH}}$                    |
| 1211  | 1172.127 | 147 | $(w + \tau) C-H_{C_{yH}} + \nu C=S + \nu C-N + \rho N-H$              |
| 1198  | 1159.544 | 667 | $\nu C=O_{H-Pyran} + \delta C-H_{Ben}$                                |
| 1136  | 1099.534 | 199 | $\nu C=S + \nu C-N + \rho N-H$                                        |
| 1135  | 1098.567 | 90  | $(\rho + \delta) C-H_{Ben}$                                           |
| 1076  | 1041.46  | 30  | $(\rho + \delta) C-H_{Ben} + \nu C=O_{H-Pyran}$                       |
| 1039  | 1005.648 | 50  | $w C-H_{C_{yH}}$                                                      |
| 1036  | 1002.744 | 112 | $\nu C=O_{H-Pyran}$                                                   |
| 969   | 937.8951 | 19  | $(w + \tau) C-H_{Ben} + \gamma C-H_{H-Pyran}$                         |
| 940   | 909.826  | 13  | $(w + \tau) C-H_{Ben} + \gamma C-H_{H-Pyran}$                         |
| 902   | 873.0458 | 24  | $\nu C=S + \rho N-H + \tau C-H_{C_{yH}}$                              |
| 843   | 815.9397 | 27  | $\nu C-O$                                                             |
| 800   | 774.32   | 9   | $\rho C-H_{C_{yH}} + \nu C=S$                                         |
| 776   | 751.0904 | 42  | $w C-H_{Ben}$                                                         |



Frequencies are given in  $\text{cm}^{-1}$ ,  $\nu$  =stretching,  $\beta$ =in-plane bending,  $\gamma$ =out-plane bending  $\delta$  =scissoring,  $\rho$ =rocking,  $w$ = wagging,  $s$  =symmetric,  $as$ =asymmetric,  $\tau$ =twisting, 5,6-dihydro-2H-Pyran-2-one = H-Pyran, Cyclohexane = Cyh, Ben=benzene ring. <sup>a</sup>scaling factor= 0.9679 [1]

**Table S6:** Calculated vibrational frequencies for **3b** by B3LYP/6-311+G(d,p)

| <sup>a</sup> Freq<br>(unscaled) | <sup>a</sup> Freq<br>(scaled) | <sup>a</sup> I <sub>IR</sub> | Vibrational assignments                                                                       |
|---------------------------------|-------------------------------|------------------------------|-----------------------------------------------------------------------------------------------|
| 3540                            | 3426.366                      | 86                           | $\nu$ N-H                                                                                     |
| 3520                            | 3407.008                      | 21                           | $\nu$ N-H                                                                                     |
| 3201                            | 3098.248                      | 12                           | $\nu(s)+\nu(as)$ C-H <sub>Ben</sub>                                                           |
| 3187                            | 3084.697                      | 13                           | $\nu(s)+\nu(as)$ C-H <sub>Ben</sub>                                                           |
| 3106                            | 3006.297                      | 22                           | $\nu(s)+\nu(as)$ C-H <sub>CH3</sub>                                                           |
| 3099                            | 2999.522                      | 25                           | $\nu$ C-H                                                                                     |
| 3082                            | 2983.068                      | 6                            | $\nu(as)$ C-H <sub>CH2</sub>                                                                  |
| 3075                            | 2976.293                      | 18                           | $\nu(s)+\nu(as)$ C-H <sub>CH3</sub>                                                           |
| 3029                            | 2931.769                      | 22                           | $\nu(s)$ C-H <sub>CH3</sub>                                                                   |
| 3023                            | 2925.962                      | 35                           | $\nu(s)$ C-H <sub>CH2</sub>                                                                   |
| 3021                            | 2924.026                      | 40                           | $\nu(s)$ C-H <sub>CH3</sub>                                                                   |
| 1797                            | 1739.316                      | 585                          | $\nu$ C=O                                                                                     |
| 1676                            | 1622.2                        | 79                           | $\nu$ C=C + $\nu$ (C=C-C=C <sub>Ben</sub> ) + $\nu$ C-H                                       |
| 1656                            | 1602.842                      | 49                           | $\nu$ C=N + $\nu(\rho)$ C-H                                                                   |
| 1647                            | 1594.131                      | 81                           | $\nu(\delta)+\nu(\rho)$ C-H <sub>Ben</sub> + $\nu$ (C=C-C=C <sub>Ben</sub> )                  |
| 1612                            | 1560.255                      | 35                           | $\nu$ C=N + $\nu(\rho)$ + ( $\delta$ ) C-H <sub>Ben</sub>                                     |
| 1604                            | 1552.512                      | 47                           | $\nu$ (C=C-C=C <sub>Ben</sub> ) + $\nu(\rho)$ + ( $\delta$ ) C-H <sub>Ben</sub>               |
| 1546                            | 1496.373                      | 809                          | $\nu(\rho)$ N-H + $\nu$ C-N                                                                   |
| 1535                            | 1485.727                      | 38                           | $\nu(\delta)+\nu(\tau)$ C-H <sub>CH3</sub> + $\nu(\rho)$ N-H + $\nu(\rho)$ C-H <sub>Ben</sub> |
| 1527                            | 1477.983                      | 51                           | $\nu$ C=S + $\nu$ C-N + $\nu(\rho)$ N-H                                                       |
| 1513                            | 1464.433                      | 128                          | $\nu$ C=S + $\nu(\rho)$ N-H + $\nu(\delta)$ C-H <sub>CH2</sub>                                |
| 1501                            | 1452.818                      | 64                           | $\nu(\delta)+\nu(\tau)$ C-H <sub>CH3</sub> + $\nu(\delta)$ C-H <sub>CH2</sub>                 |
| 1485                            | 1437.332                      | 40                           | $\nu(\rho)$ C-H <sub>Ben</sub> + $\nu$ (C=C-C=C <sub>Ben</sub> )                              |
| 1483                            | 1435.396                      | 84                           | $\nu(\delta)+\nu(\tau)$ C-H <sub>CH3</sub> + $\nu(\rho)$ C-H <sub>Ben</sub>                   |
| 1424                            | 1378.29                       | 41                           | $\nu(w)$ C-H <sub>CH2</sub> + $\nu(\rho)$ C-H + $\nu(\rho)$ N-H                               |
| 1416                            | 1370.546                      | 14                           | $\nu(w)$ C-H <sub>CH3</sub>                                                                   |
| 1348                            | 1304.729                      | 238                          | $\nu(\rho)$ N-H + $\nu$ (C=C-C=C <sub>Ben</sub> ) + $\nu$ C-H                                 |
| 1315                            | 1272.789                      | 65                           | $\nu(\rho)$ N-H + $\nu(\rho)$ C-H <sub>Ben</sub>                                              |
| 1312                            | 1269.885                      | 87                           | $\nu(\rho)$ N-H + $\nu(\rho)$ C-H <sub>Ben</sub>                                              |
| 1279                            | 1237.944                      | 58                           | $\nu$ C-N + $\nu$ (C=C-C=C <sub>Ben</sub> ) + $\nu(\rho)$ N-H                                 |
| 1270                            | 1229.233                      | 62                           | $\nu(\tau)$ C-H <sub>CH2</sub>                                                                |
| 1258                            | 1217.618                      | 332                          | $\nu(\tau)$ C-H <sub>CH2</sub> + $\nu$ (C=C-C=C <sub>Ben</sub> ) + $\nu$ C-C + $\nu$ C-O      |
| 1229                            | 1189.549                      | 73                           | $\nu$ C=S + $\nu(\delta)+\nu(\rho)$ C-H <sub>Ben</sub> + $\nu(\rho)$ N-H                      |
| 1206                            | 1167.287                      | 400                          | $\nu$ C-N + $\nu(\rho)$ N-H + $\nu$ C=S                                                       |

|      |          |     |                                                                                                                                |
|------|----------|-----|--------------------------------------------------------------------------------------------------------------------------------|
| 1200 | 1161.48  | 116 | $\nu(\rho) \text{ C-H}_{\text{Pyran}} + \nu(\delta) \text{ C-H}_{\text{Ben}} + \nu \text{ C-C}$                                |
| 1106 | 1070.497 | 167 | $\nu \text{ N-N} + \nu(\rho) \text{ C-H} + \nu \text{ C-O}$                                                                    |
| 1055 | 1021.135 | 41  | $\nu(\delta) + \nu(\rho) \text{ C-H}_{\text{Ben}} + \nu (\text{C=C-C}=\text{C}_{\text{Ben}}) + \nu \text{ C-O}_{\text{Pyran}}$ |
| 1028 | 995.0012 | 138 | $\nu \text{ C-O} + \nu(\gamma)\text{C-H}_{\text{Pyran}}$                                                                       |
| 1022 | 989.1938 | 40  | $\nu \text{ C-O}_{\text{Pyran}} + \nu(\rho)\text{C-H}_{\text{CH}_2}$                                                           |
| 973  | 941.7667 | 32  | $\nu(\tau) + \nu(w) \text{ C-H}_{\text{Ben}}$                                                                                  |
| 952  | 921.4408 | 21  | $\nu(\tau) + \nu(w) \text{ C-H}_{\text{Ben}} + \nu(\gamma)\text{C-H}$                                                          |
| 952  | 921.4408 | 14  | $\nu(\tau) + \nu(w) \text{ C-H}_{\text{Ben}} + \nu(\gamma)\text{C-H}$                                                          |
| 877  | 848.8483 | 21  | $\nu(\tau) + \nu(w) \text{ C-H}_{\text{Ben}}$                                                                                  |
| 769  | 744.3151 | 63  | $\nu(w) \text{ C-H}_{\text{Ben}}$                                                                                              |
| 765  | 740.4435 | 56  | $\nu(w) \text{ C-H}_{\text{Ben}} + \nu(\tau)\text{C-H}_{\text{CH}_3}$                                                          |
| 763  | 738.5077 | 63  | $\nu(w) \text{ C-H}_{\text{Ben}}$                                                                                              |
| 657  | 635.9103 | 14  | $\beta(\text{C=C-C}=\text{C}_{\text{Ben}})$                                                                                    |
| 622  | 602.0338 | 18  | $\beta(\text{C=C-C}=\text{C}_{\text{Ben}})$                                                                                    |

Frequencies are given in  $\text{cm}^{-1}$ ,  $\nu$  =stretching,  $\beta$ =in-plane bending,  $\gamma$ =out-plane bending  $\delta$ =scissoring,  $\rho$ =rocking,  $w$ =wagging,  $s$  =symmetric,  $as$ =asymmetric,  $\tau$ =twisting, Ben=benzene ring, 3,6-dihydro-2H-Pyran = Pyran <sup>a</sup>scaling factor= 0.9679 [1]

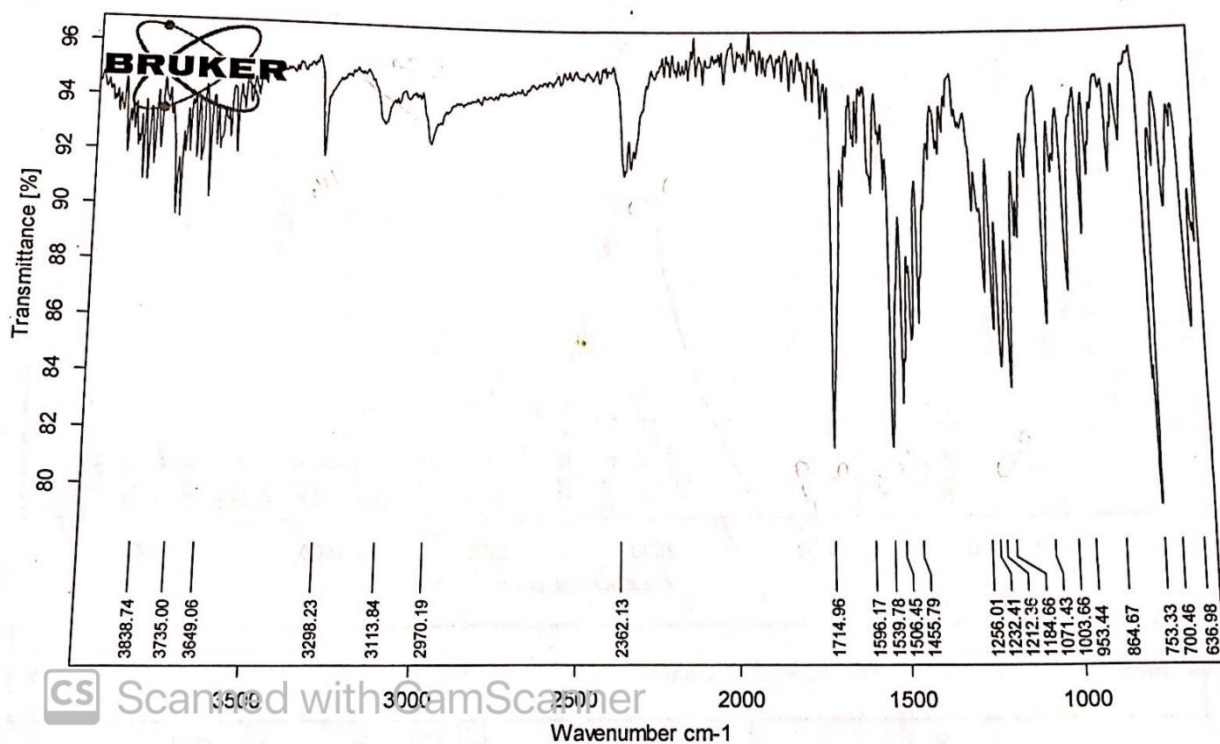

**Figure S1:** Experimental vibrational frequencies for **3a**

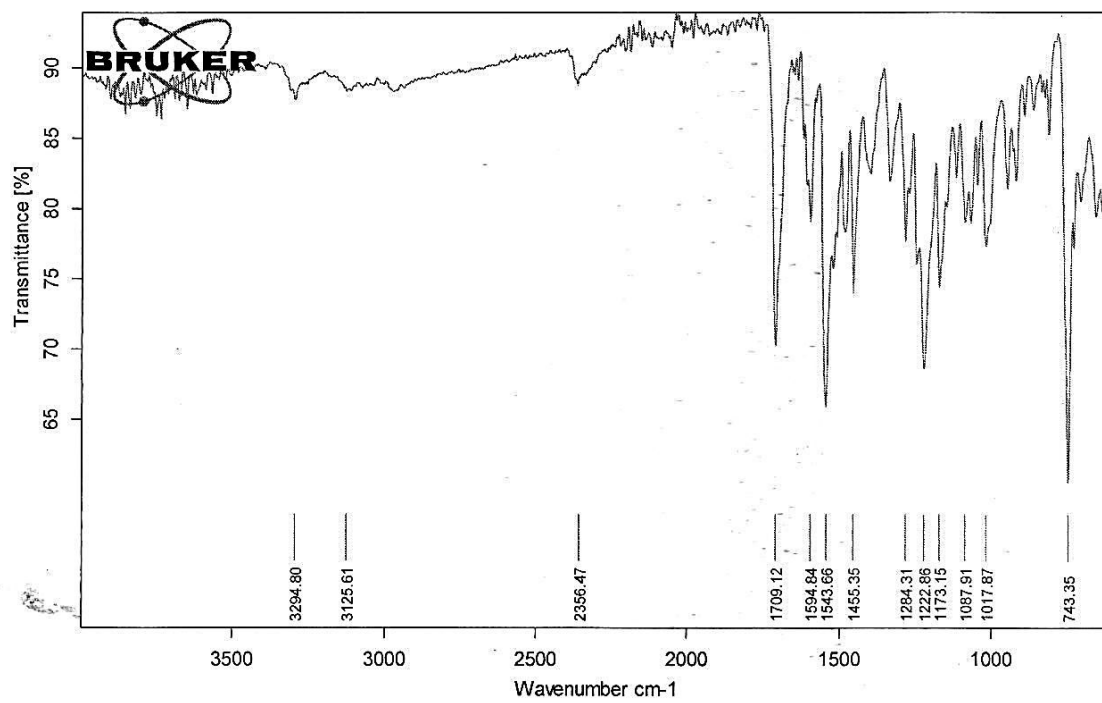

**Figure S2:** Experimental vibrational frequencies for **3b**.

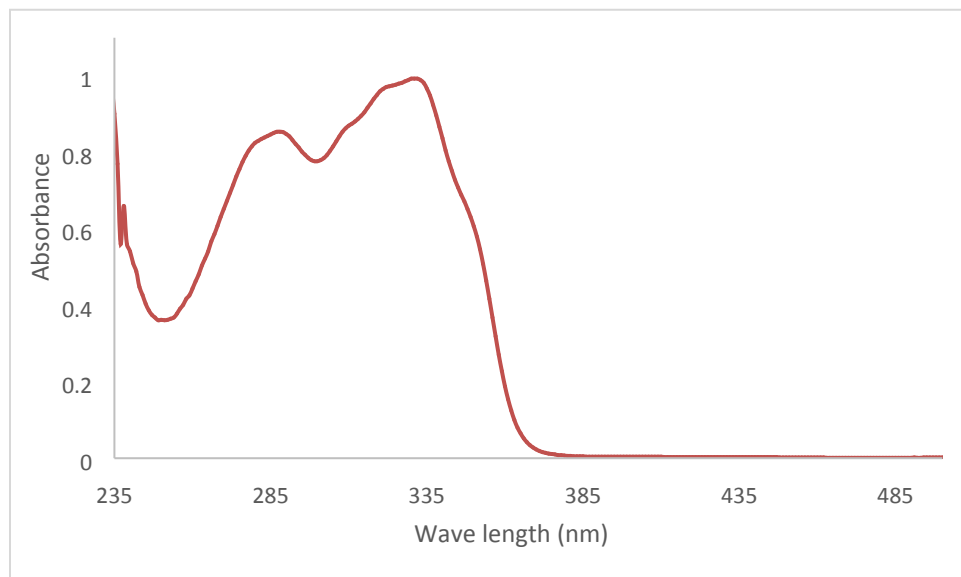

**Figure S3:** UV-Vis spectra of **3a** molecule.

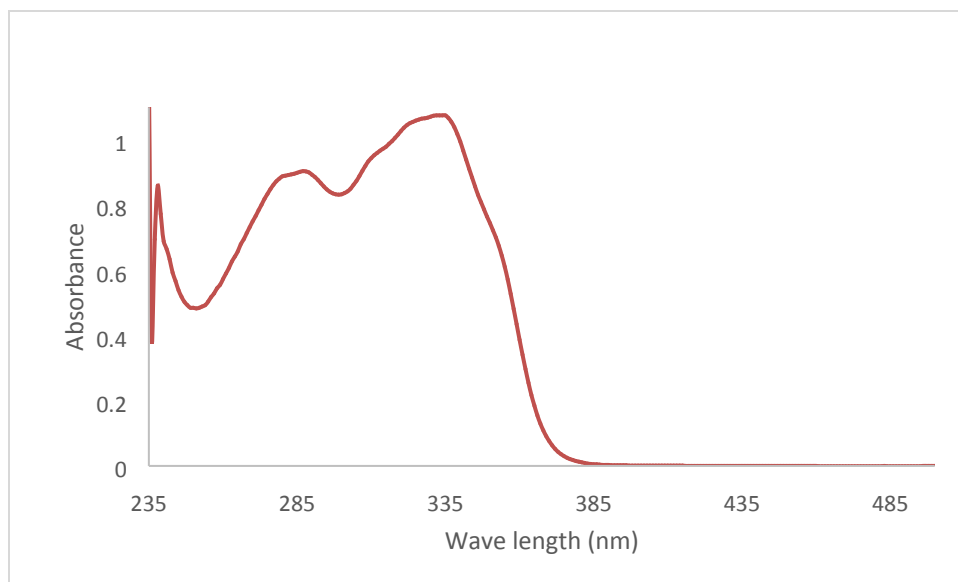

**Figure S4:** UV-Vis spectra of **3b** molecule.

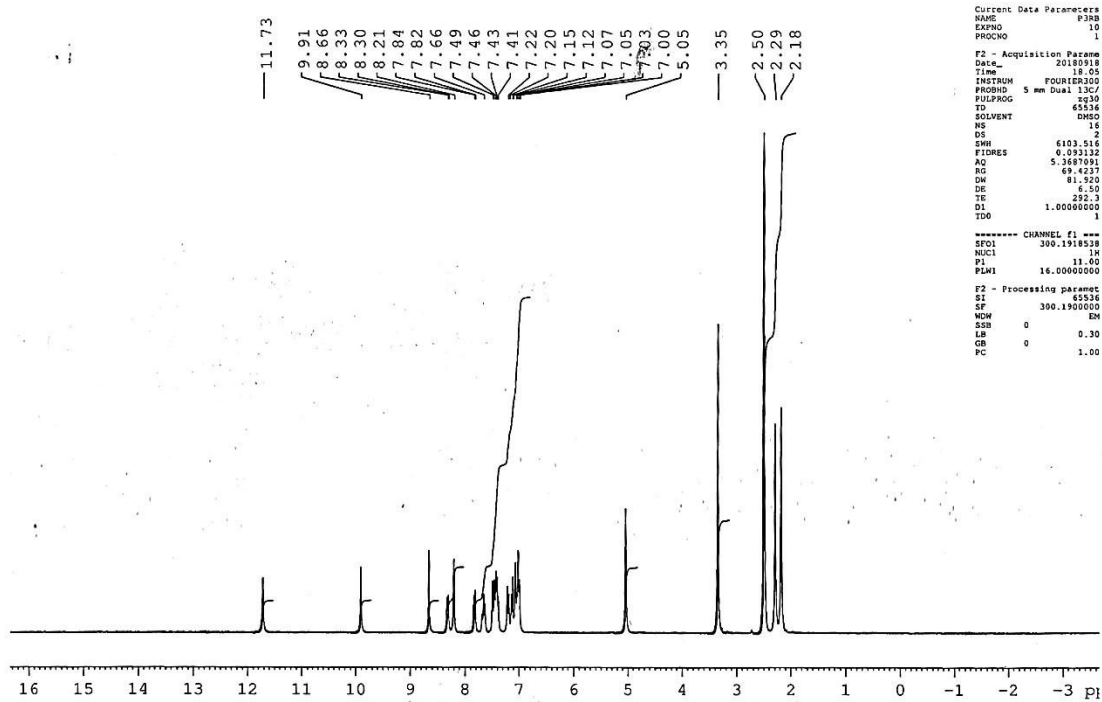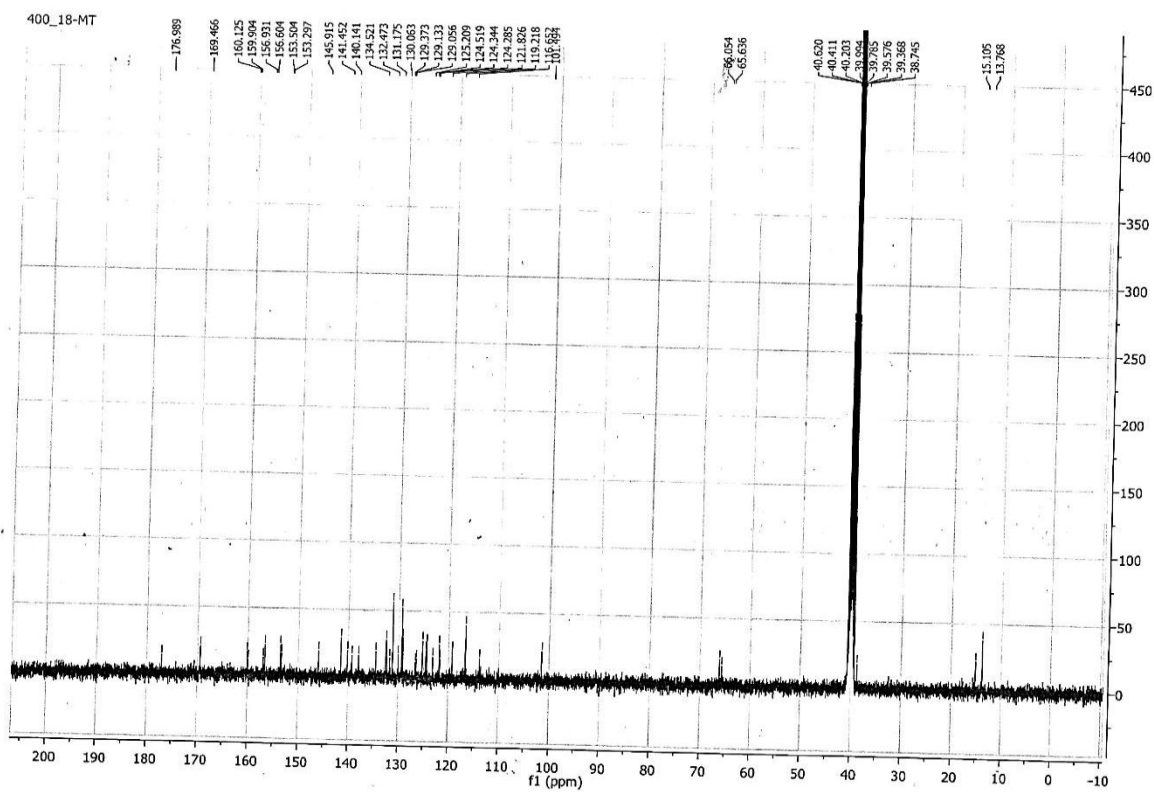

Figure S5: NMR spectra of 3a molecule.

HF-RAFIQ-20180704-03H-RB-3

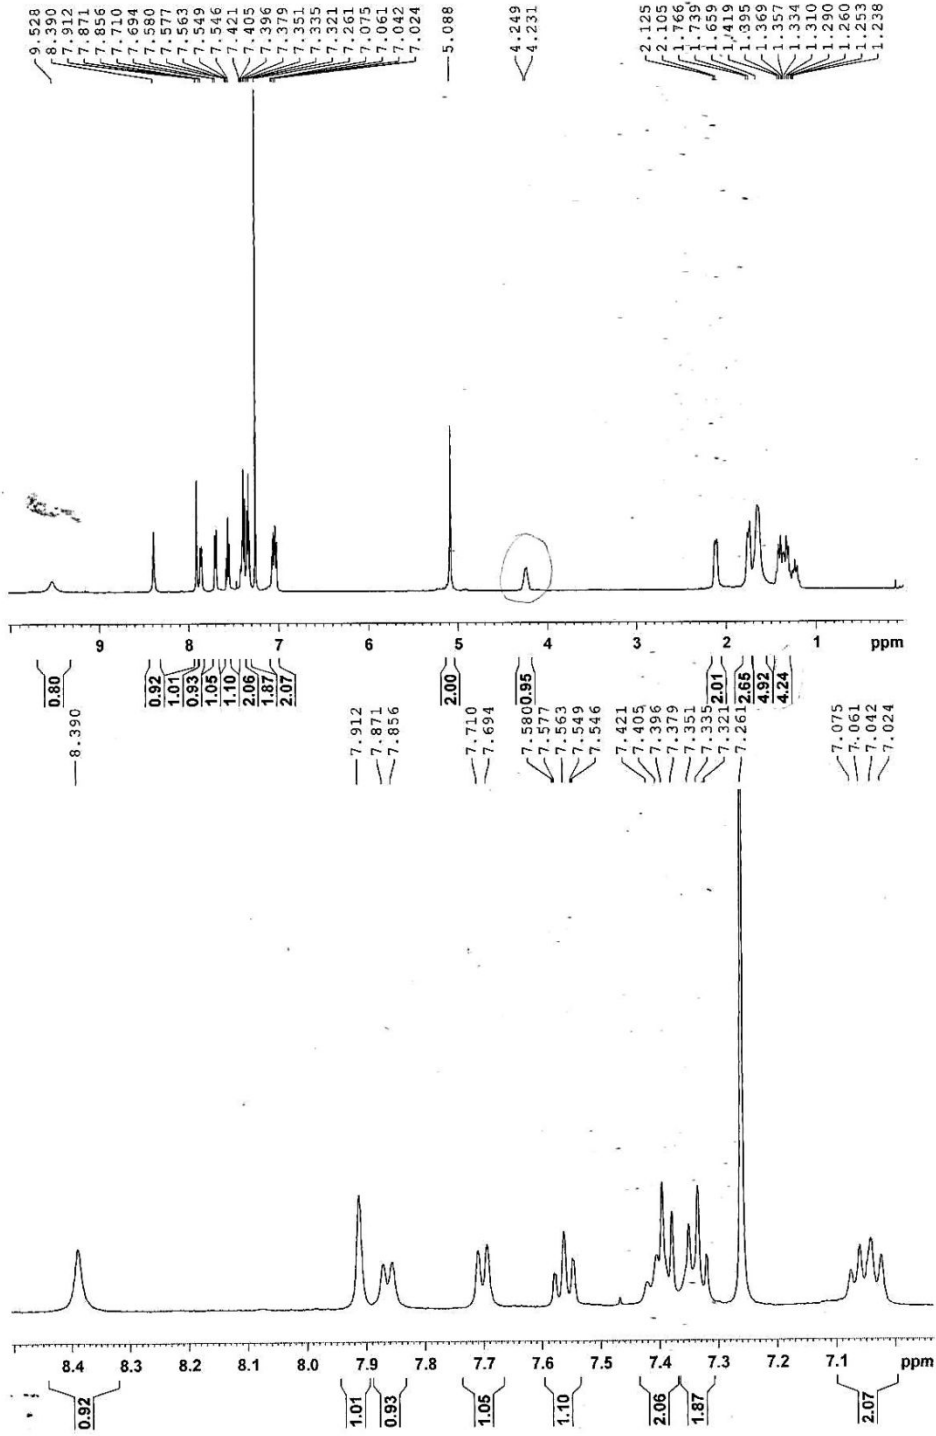

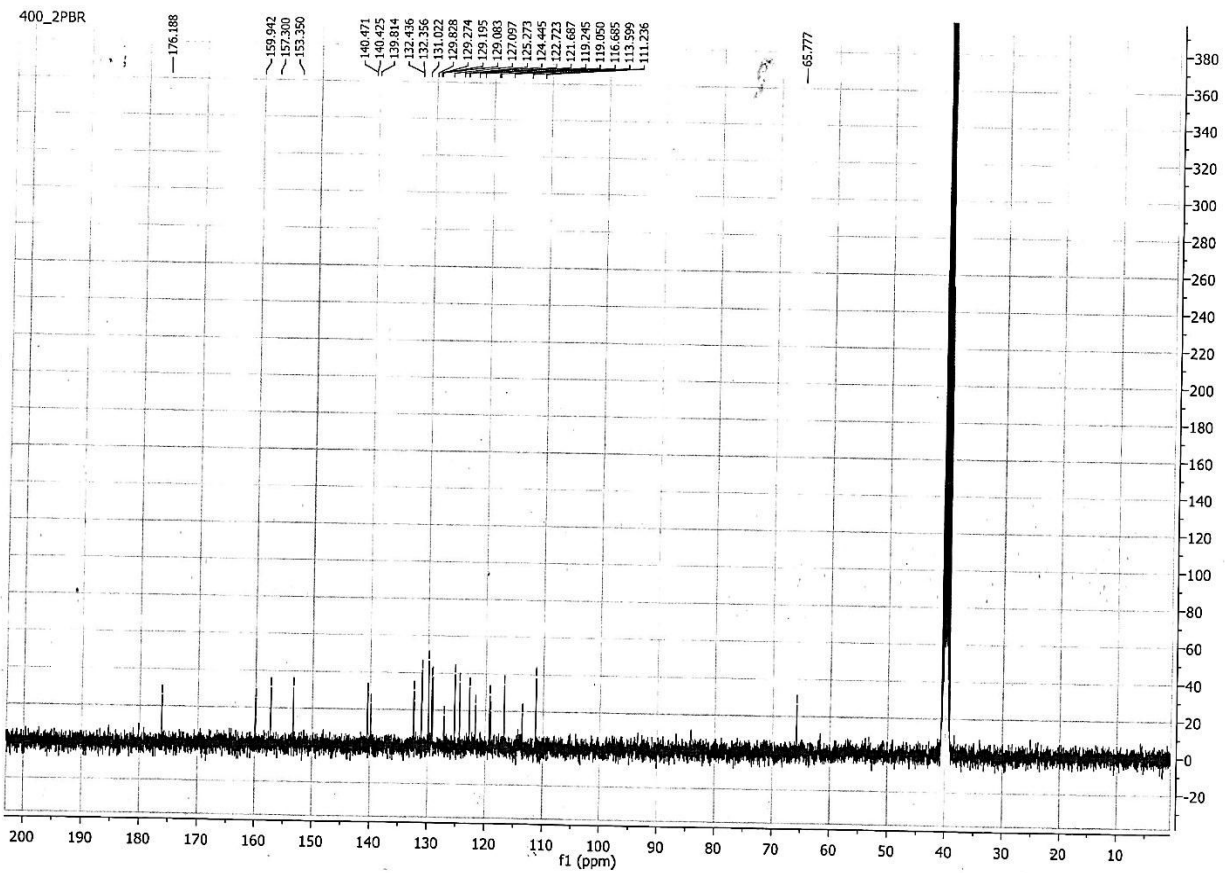

Figure S6: NMR spectra of **3b** molecule
